# Supplementary material for: Re-emergence of T lymphocyte-mediated synaptopathy in progressive multiple sclerosis
Source: PubMed Central journal article supplement (PMC11190089; doi:10.3389/fimmu.2024.1416133), 2024-06-07
Supplement: Table_1.pdf [file Table_1.pdf]

**Supplementary Table 1: Statistical Analysis**

| <b>Figure</b> | <b>Pre hoc</b>                                                                                                                                                              | <b>Post hoc</b>                 | <b>N / n</b><br>(number of animals / samples)                                                                                                                   |
|---------------|-----------------------------------------------------------------------------------------------------------------------------------------------------------------------------|---------------------------------|-----------------------------------------------------------------------------------------------------------------------------------------------------------------|
| <b>1 A</b>    | Unpaired two-tailed Student's t test:<br>1) rise time: $t=2.325$ , $p=0.0223$<br>2) decay time: $t=3.351$ , $p=0.0012$<br>3) half width: $t= 2.748$ , $p=0.0072$<br>Df: 93  |                                 | N: HC 6; SPMS 7<br>n (number of cells): HC 55; SPMS 40                                                                                                          |
| <b>1 B</b>    | Unpaired two-tailed Student's t test:<br>1) rise time: $t=2.643$ , $p=0.0229$<br>2) decay time: $t=2.594$ , $p=0.0249$<br>3) half width: $t= 2.523$ , $p=0.0283$<br>Df: 11  |                                 | N: HC 6; SPMS 7<br>n (number of cells): HC 55; SPMS 40                                                                                                          |
| <b>2 A</b>    | Unpaired two-tailed Student's t test:<br>1) rise time: $t=1.208$ , $p=0.2303$<br>2) decay time: $t=4.088$ , $p<0.0001$<br>3) half width: $t= 2.238$ , $p=0.0277$<br>Df: 89  |                                 | N: SPMS 7; SPMS-SIP 7<br>n (number of cells): SPMS 40;<br>SPMS-SIP 51                                                                                           |
| <b>2 B</b>    | Unpaired two-tailed Student's t test:<br>1) rise time: $t=2.213$ , $p=0.0470$<br>2) decay time: $t=4.584$ , $p=0.0006$<br>3) half width: $t= 2.993$ , $p=0.0112$<br>Df: 12  |                                 | N: SPMS 7; SPMS-SIP 7<br>n (number of cells): SPMS 40;<br>SPMS-SIP 51                                                                                           |
| <b>3 A</b>    | One-way ANOVA:<br>1) rise time: $F(2,29)=4.163$ , $p=0.0257$<br>2) decay time: $F(2,29)=5.896$ , $p=0.0071$<br>3) half width: $F(2,29)=7.158$ , $p=0.0030$                  | Tukey multiple comparisons test | N: EAE-VHL 4; EAE-SIP 0.4 $\mu\text{M}$ 4; EAE-SIP 1 $\mu\text{M}$ 4<br>n (number of cells): EAE-VHL 9; EAE-SIP 0.4 $\mu\text{M}$ 15; EAE-SIP 1 $\mu\text{M}$ 8 |
| <b>3B</b>     | Unpaired two-tailed Student's t test:<br>1) rise time: $t=1.929$ , $p=0.0689$<br>2) decay time: $t=0.3352$ , $p=0.7412$<br>3) half width: $t=0.6705$ , $p=0.5106$<br>Df: 19 |                                 | N: EAE-SIP 1 $\mu\text{M}$ 4; EAE-SIP 1 $\mu\text{M}$ +NIBR0213 4<br>n (number of cells): EAE-SIP 1 $\mu\text{M}$ 8; EAE-SIP 1 $\mu\text{M}$ +NIBR0213 13       |
| <b>3B'</b>    | Unpaired two-tailed Student's t test:<br>1) rise time: $t=0.4015$ , $p=0.6923$<br>2) decay time: $t=1.135$ , $p=0.2700$<br>3) half width: $t=0.9697$ , $p=0.3438$<br>Df: 20 |                                 | N: EAE-VHL 4; EAE-AUY957 4<br>n (number of cells): EAE-VHL 9;<br>EAE-AUY957 13                                                                                  |
| <b>3B''</b>   | Unpaired two-tailed Student's t test:<br>1) rise time: $t=1.064$ , $p=0.3007$<br>2) decay time: $t=4.390$ , $p=0.0003$<br>3) half width: $t=4.032$ , $p=0.0007$<br>Df: 19   |                                 | N: EAE-VHL 4; EAE-A971432 4<br>n (number of cells): EAE-VHL 9;<br>EAE-A971432 12                                                                                |
